# Supplementary material for: Quantum and classical inter-cage hopping of hydrogen molecules in clathrate hydrate: temperature and cage-occupation effects
Source: Royal Society of Chemistry journal article supplement (doi:10.1039/c6cp06531g), 2016-12-06
Supplement: c6cp06531g1.pdf [file c6cp06531g1.pdf]

### Supplementary information

Quantum and classical inter-cage hopping of hydrogen molecules in clathrate hydrate:  
temperature and cage-occupation effects.

Christian J Burnham\*, Zdeněk Futera and Niall J. English\*

School of Chemical and Bioprocess Engineering, University College Dublin, Belfield, Dublin 4, Ireland

Corresponding authors: christian.burnham@ucd.ie, niall.english@ucd.ie

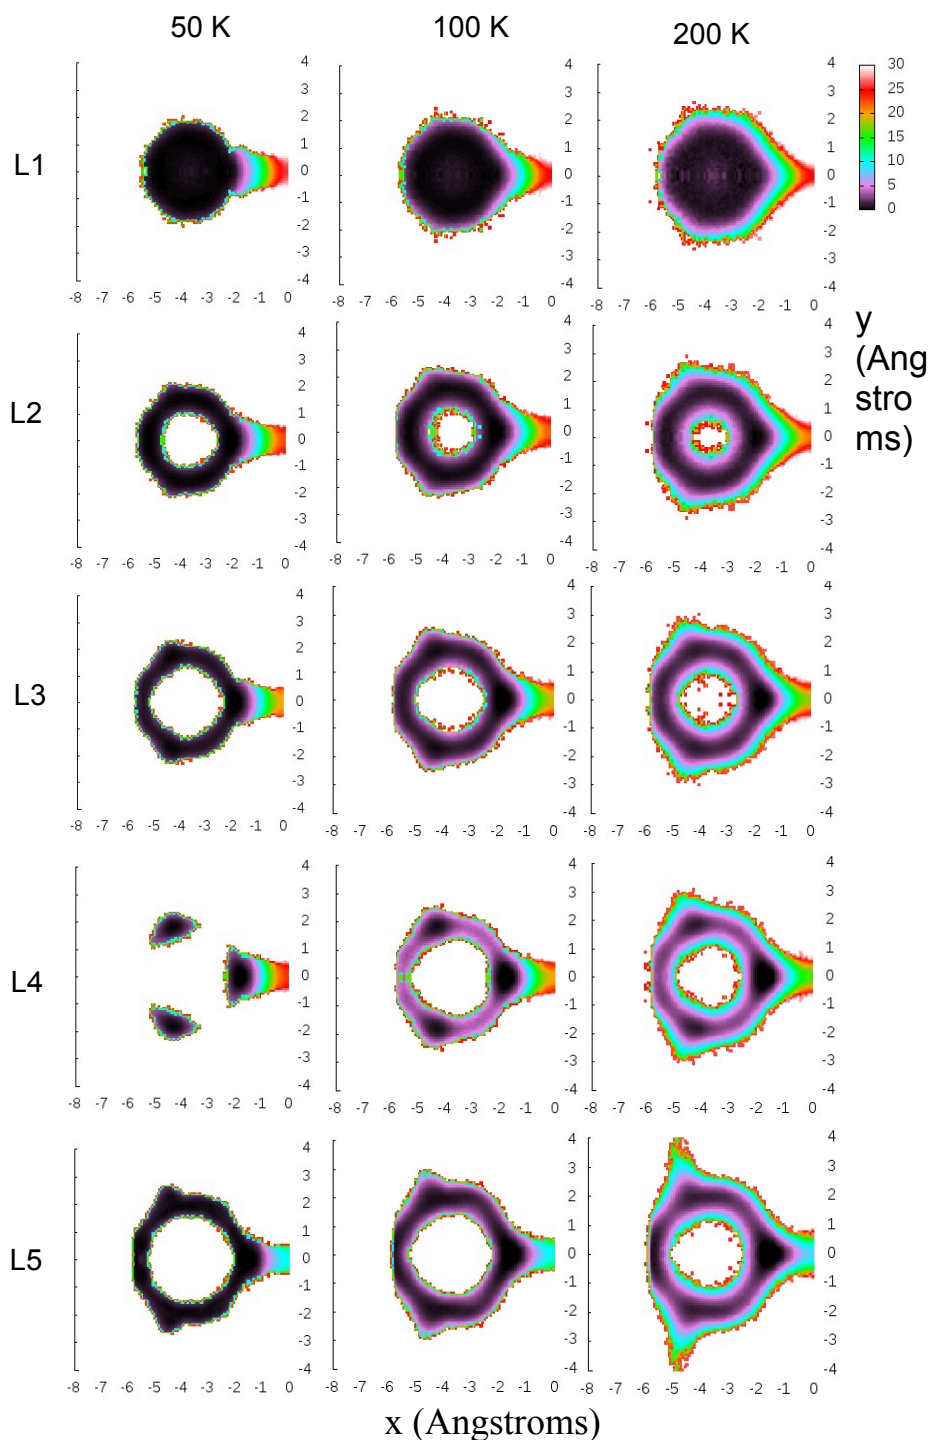

Figure S1. Free-energy surfaces  $F(x,y)$  for the different occupations and different temperatures, where the colour corresponds to the free-energy value in kJ/mol, and  $x$  and  $y$  are the perpendicular and parallel distances from the center of the bridging hexamer.

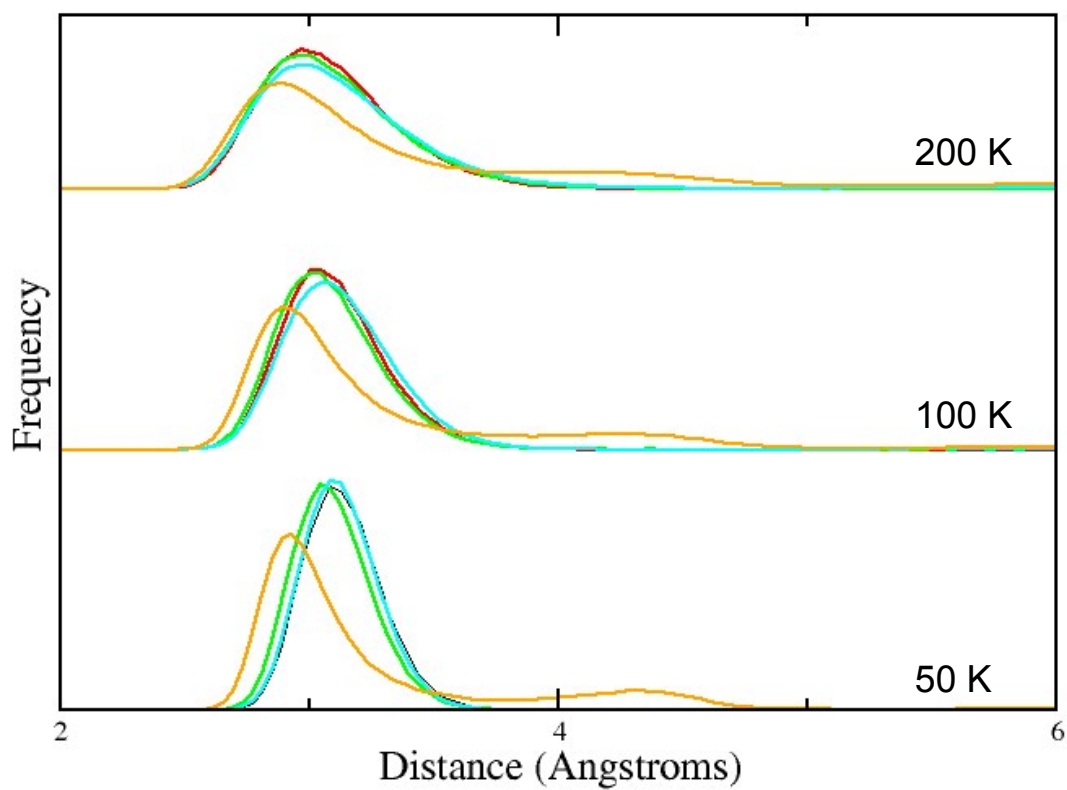

Figure S2. H<sub>2</sub> centre-of-mass distribution functions (path-integral). (a): above - Intermolecular separation between H<sub>2</sub> centres of mass inside each cage. (b): overleaf - Radial distance of H<sub>2</sub> centres of mass from the cage centre. (Divided by  $r^2$  to give the frequency per unit shell volume.) Colour scheme: Black, red, green, cyan, orange corresponds to L1, L2, L3, L4, L5

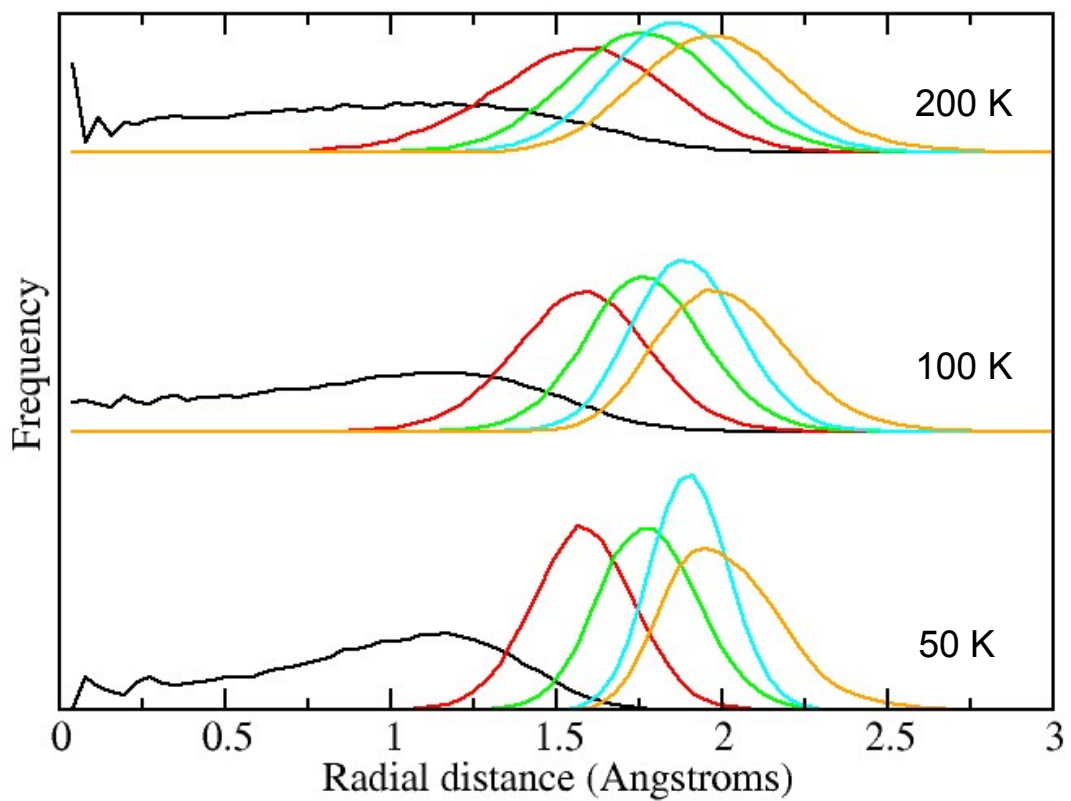

See figure caption for bottom part of Figure S2 on the previous page (marked "overleaf").
